**A-899** Room A, 10/16/2000 2:00 PM - 4:00 PM (PS)  
**Analgesia with Continuous Epidural Ropivacaine Facilitates Gastric Emptying after Major Abdominal Surgery** *Concezione Tommasino, MD; Carla Martani, MD; Roberto Valeri, MD; Linda Brugali, MD; Marcello Marinelli, MD, Anesthesia and Intensive Care, University of Milano, IRCCS San Raffaele H, Milano, Italy.* Epidural ropivacaine, not iv meperidine, facilitates gastric emptying.

**A-900** Room A, 10/16/2000 2:00 PM - 4:00 PM (PS)  
**Peribulbar Block with Versus without Propofol Sedation** *Alain C. Van Elstraete, MD; Thierry Lebrun, MD; Frederic Pastureau, MD, Anesthesiology, Clinique Saint-Paul, Fort de France, Martinique, France.* During peribulbar block, sedation with propofol is useful to avoid unpleasant remembering of the puncture but leads to patients movements and respiratory depression.

**A-901** Room A, 10/16/2000 2:00 PM - 4:00 PM (PS)  
**Anterior Sciatic Nerve Block and Concerns of Femoral Nerve and Artery Trauma: How Likely Are They?** *Jerry D. Vloka, MD, PhD; Admir Hadzic, MD, PhD; Mirsad Dupanovic, MD; Kevin Sanborn; Daniel M. Thys, MD, Anesthesiology Department, St. Luke's/ Roosevelt Hospital Center, New York, NY, United States.* Vloka JD et al. Femoral artery or nerve trauma during anterior sciatic nerve block is unlikely.

**A-902** Room A, 10/16/2000 2:00 PM - 4:00 PM (PS)  
**Surgeons and Anesthesiologists Differ in Rating the Benefits and Liabilities of Regional Anesthesia, and in Who Should Choose the Anesthetic** *R.S. Weller, MD; J.C. Gerancher, MD, Anesth. Dept., Wake Forest Univ. Sch. of Med., Winston-Salem, NC, United States.* Anesthesiologists perceive more analgesic benefit of regional anesthesia, and surgeons more inefficiency. Both prefer regional for themselves.

### Local Anesthesia: Pain - Basic

**A-903** Room B, 10/16/2000 2:00 PM - 4:00 PM (PS)  
**No Difference in Cerebrospinal Fluid Pharmacokinetics of Intrathecally Administered Adenosine in Normal Versus Spinal Nerve Ligated Rats** *Carsten Bantel, M.D.; Xinhui Li, Ph.D.; James C. Eisenach, M.D., Dept. of Anesthesiology, Wake Forest Univ. School of Medicine, Winston-Salem, NC, United States.* Adenosine disappears in cerebrospinal fluid within 15 min after one IT bolus injection in neuropathic rats.

**A-904** Room B, 10/16/2000 2:00 PM - 4:00 PM (PS)  
**Quantitative PCR of Opioid Peptide mRNAs Correlates with Stress-Induced Analgesia** *Alexander Brack, MD; Heike L. Rittner, MD; Halina Machbelska-Stein, PhD; Christoph Stein, MD; Michael Schaefer, MD, Dept Anesthesiology, University Hospital Benjamin Franklin, Berlin, Germany.* Upregulation of POMC and PENK mRNAs in the inflamed hindpaw of the rat occurs in parallel with stress-induced analgesia.

**A-905** Room B, 10/16/2000 2:00 PM - 4:00 PM (PS)  
**Comparison of Intrathecal Drugs on Extraterritorial Allodynia in Rats with Peripheral Mononeuropathy** *Asokumar Buvanendran, M.D.; Jeffrey S. Kroin, Ph.D.; Robert J. McCarthy, Pharm.D.; Anthony D. Ivankovich, M.D., Department of Anesthesiology, Rush Medical College, Chicago, IL, United States.* Intrathecal clonidine and neostigmine, but not MK801, reduce extraterritorial mechanical allodynia.

**A-906** Room B, 10/16/2000 2:00 PM - 4:00 PM (PS)  
**Characteristics of Extraterritorial Allodynia in Rats with Peripheral Mononeuropathy** *Asokumar Buvanendran, M.D.; Robert J. McCarthy, Pharm.D.; Jeffrey S. Kroin, Ph.D.; Anthony D. Ivankovich, M.D., Department of Anesthesiology, Rush Medical College, Chicago, IL, United States.* Extraterritorial allodynia after sciatic nerve injury was evident in the saphenous and pudendal nerve distributions by day 14.

**A-907** Room B, 10/16/2000 2:00 PM - 4:00 PM (PS)  
**Nociceptive Behavior in Streptozocin-Induced Diabetic Mice Given Intrathecal Substance P, NMDA, and PACAP** *Eugene Y. Cheng, MD; Jose J.E. Hernandez, MD; Masabiro Obsawa, PhD; Hirokazu Mizoguchi, PhD; Leon F. Tseng, PhD, Anesthesiology, Medical College of Wisconsin, Milwaukee, WI, United States.* Spinal nociceptive processing is enhanced in diabetic mice. Substance P, NMDA, and PACAP are involved in this process.

**A-908** Room B, 10/16/2000 2:00 PM - 4:00 PM (PS)  
**Effect of Neuropathic Pain on Nociceptin Expression in the Spinal Cord of the Rat** *Anja Gabriel; Stefan Grond; Thomas Meuser; Manobar Sharma; Pamela Pierce Palmer, Department of Anesthesia, University of California, San Francisco, CA, United States.* Sciatic nerve ligation induces changes in the localization and density of nociceptin in spinal cord dorsal horn.

**A-909** Room B, 10/16/2000 2:00 PM - 4:00 PM (PS)  
**Modulation of Serotonin-Induced Plasma Extravasation in the Rat Knee Joint by Nociceptin** *Stefan Grond, MD; Anja Gabriel, MD; Christian Pietruck, MD; Guo-Xi Xie, MD; Pamela Pierce Palmer, MD, PhD, Department of Anesthesia, University of California, San Francisco, CA, United States.* Knee joint perfusion of 1  $\mu$ M nociceptin decreases and that of 1 nM nociceptin increases serotonin-induced inflammation.

**A-910** Room B, 10/16/2000 2:00 PM - 4:00 PM (PS)  
**Effects of Pretreatment with Lidocaine, MK-801 and CNQX on Development of Hyperexcitability after Incision in Spinal Dorsal Horn Neurons** *Mikito Kawamata, MD; Eichichi Narimatsu, MD; Yoshito Nakayama, MD; Keiichi Omote, MD; Akiyoshi Namiki, MD, PhD, Anesthesiology, Sapporo Medical University, Sapporo, Hokkaido, Japan.* Pretreatment with lidocaine, MK801 and CNQX did not suppress incisional pain.

**A-911** Room B, 10/16/2000 2:00 PM - 4:00 PM (PS)  
**Involvement of Capsaicin Sensitive Primary Afferent in Spinal NMDA-Induced NO and Glutamate Release, and Pain-Related Behavior** *Tomoyuki Kawamata, MD; Keiichi Omote, MD; Mikito Kawamata, MD; Akiyoshi Namiki, MD, Anesthesiology, Sapporo Med Univ Sch of Med, Sapporo, Hokkaido, Japan.* Capsaicin sensitive primary afferents are involved in spinal NMDA-induced glutamate release, but not NO release.

**A-912** Room B, 10/16/2000 2:00 PM - 4:00 PM (PS)  
**Gabapentin Attenuate Increased mRNA Gene Expression of NMDA Receptor in Neuropathic Rats** *Hae-Kyu Kim, M.D., Ph.D.; Jae-Young Kwon, M.D., Ph.D.; Seong-Wan Baik, M.D., Ph.D.; Sang-Wook Shin, M.D., Ph.D.; Kyung-Hoon Kim, M.D., Department of Anesthesiology, Pusan National University College of Medicine, Pusan, Korea.* Gabapentin produced a dose-dependent decrease in NMDAR mRNA gene expression in neuropathic rats.
